# Supplementary material for: Sex Ratio Is Synergistically Modulated by Local Resource Competition and Enhancement: the Case of a Primitively Eusocial Wasp Under Female Philopatry
Source: Research Square preprint supplement (doi:10.21203/rs.3.rs-138286/v1), 2021-01-05
Supplement: Supplementary file 1 [file 0cd889ee46c50928fae23d32.docx]

Table S2. Primer pairs for five loci for microsatellite genotyping for *Ropalidia plebeiana*.

| Loci | Forward | Reverse | GenBank Accession No. |
| --- | --- | --- | --- |
| RP02 | 5'-cgagtttcatttaccctcag-3' | 5'-aagaactagcgtgtatccca-3' | AB128976 |
| RP04 | 5'-gtttcaatgggctttagggt-3' | 5'-gaacacacatttttggacgc-3' | AB128977 |
| RP06 | 5'-tacgcgctttgtcgagattc-3' | 5'-aagatggggataacgtcggt-3' | AB128978 |
| RP09 | 5'-gatagagtgtgcgcgaac-3' | 5'-tgtgttgtgcgtgagcga-3' | AB128980 |
| Rrev188* | 5’-attcaagggctgttctcagtc-3’ | 5’-gggcgataaagaaaggaaaag-3’ | AY247116 |

*: cited from Henshaw et al. [32]
