# Supplementary material for: Sex Ratio Is Synergistically Modulated by Local Resource Competition and Enhancement: the Case of a Primitively Eusocial Wasp Under Female Philopatry
Source: Research Square preprint supplement (doi:10.21203/rs.3.rs-138286/v1), 2021-01-05
Supplement: Supplementary file 2 [file eab31f1ae1f1fa36170ebe5f.docx]

Table S1. Geographical points of populations of *Ropalidia plebeiana*.

| Populations | Longitude | Latitude | No. of collected samples |
| --- | --- | --- | --- |
| Cabbage Tree Creek | 35°34'23"S | 150°02'26"E | 20 |
| Cliff | 35°34'40"S | 150°03'19"E | 20 |
| Colombo Creek | 36°38'09"S | 149°34'38"E | 19 |
| Dinner Creek | 35°35'27"S | 150°03'51"E | 25 |
| Dry River | 36°28'09"S | 149°51'57"E | 32 |
| Lawler Creek | 36°09'24"S | 150°05'47"E | 40 |
| Middle Creek | 35°33'32"S | 150°16'43"E | 14 |
| Near Araluen 1 | 35°40'S | 149°50'E | 15 |
| Near Araluen 3 | 35°42'S | 149°52'E | 17 |
| New | 35°36'S | 150°04'30"E | 26 |
| Sheep Station Creek | 35°40'02"S | 150°10'05"E | 27 |
| T3 | 35°39'20"S | 150°09'07"E | 15 |
| U Termail Creek | 35°27'31"S | 150°22'14"E | 19 |
| Whittakers Creek | 36°07'55"S | 150°05'27"E | 20 |

Table S1. Geographical points of populations of *Ropalidia plebeiana*.

| Populations | Longitude | Latitude | No. of collected samples |
| --- | --- | --- | --- |
| Cabbage Tree Creek | -35.57305555 | 150.04055555 | 20 |
| Cliff | -35.57777777 | 150.05527777 | 20 |
| Colombo Creek | -36.63583333 | 149.57722222 | 19 |
| Dinner Creek | -35.59083333 | 150.06416666 | 25 |
| Dry River | -36.46916666 | 149.86583333 | 32 |
| Lawler Creek | -36.15666666 | 150.09638888 | 40 |
| Middle Creek | -35.55888888 | 150.27861111 | 14 |
| Near Araluen 1 | -35.66666666 | 149.83333333 | 15 |
| Near Araluen 3 | -35.70000000 | 149.83333333 | 17 |
| New | -35.60000000 | 150.07500000 | 26 |
| Sheep Station Creek | -35.66722222 | 150.16805555 | 27 |
| T3 | -35.65555555 | 150.15194444 | 15 |
| U Termail Creek | -35.45861111 | 150.37055555 | 19 |
| Whittakers Creek | -36.13194444 | 150.09083333 | 20 |
